# Supplementary material for: Genomic analysis of the molecular neuropathology of tuberous sclerosis using a human stem cell model
Source: PubMed Central journal article supplement (PMC5031259; doi:10.1186/s13073-016-0347-3), 2016-09-21
Supplement: 13073_2016_347_MOESM1_ESM.pdf [file 13073_2016_347_MOESM1_ESM.pdf]

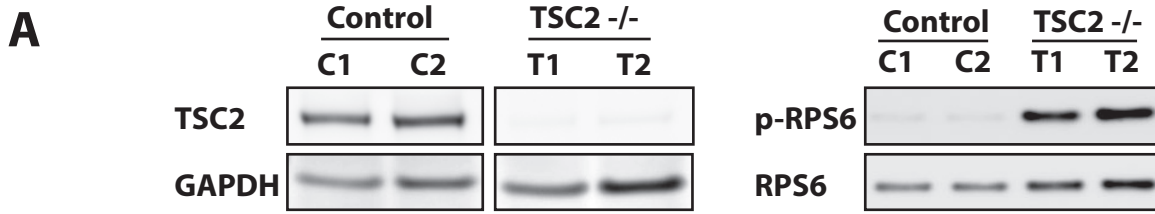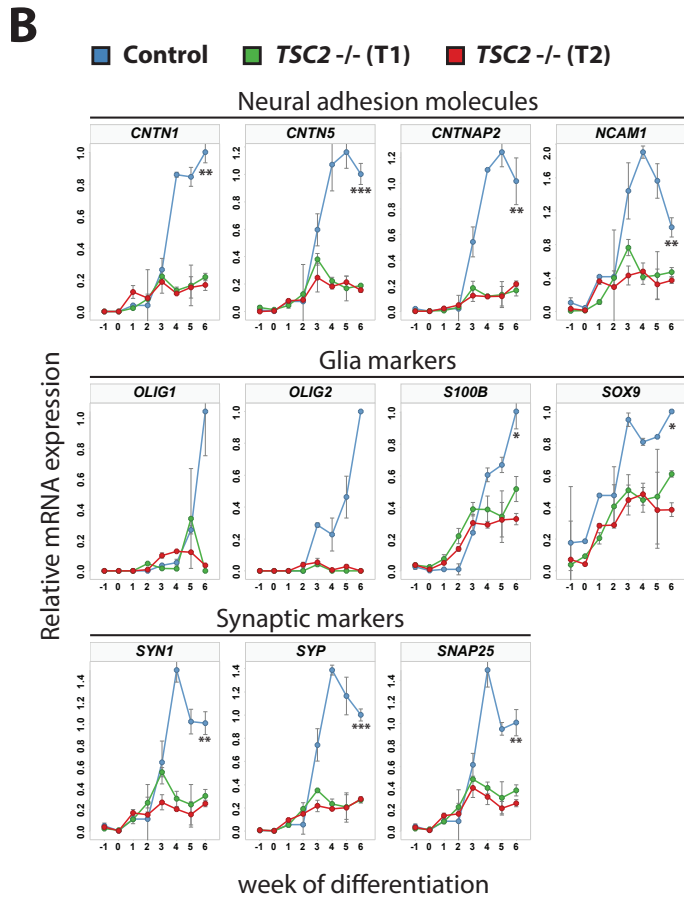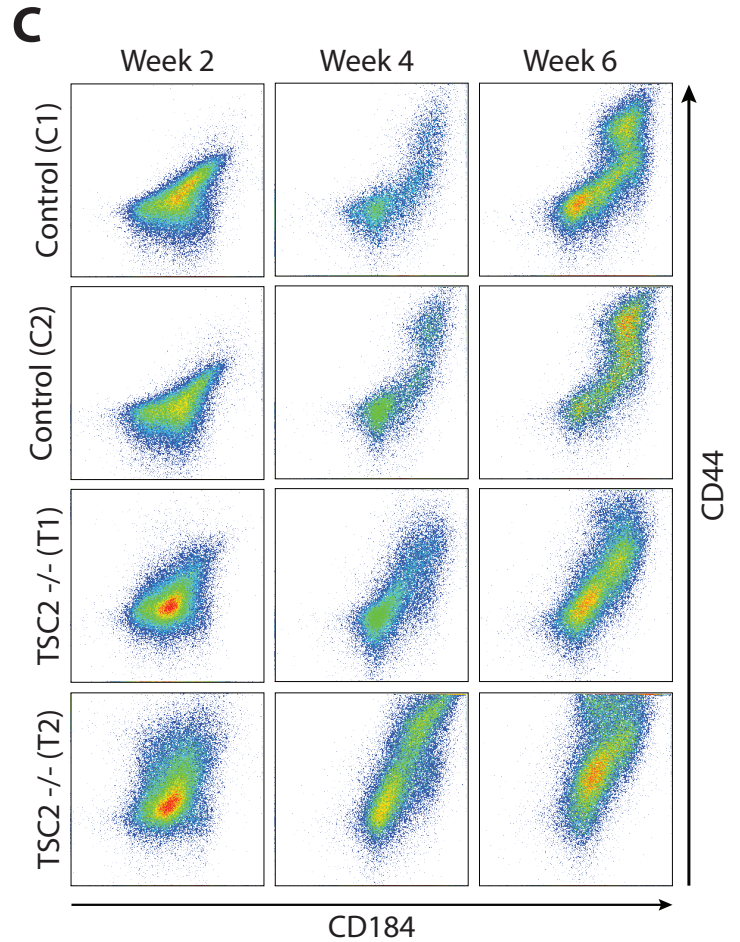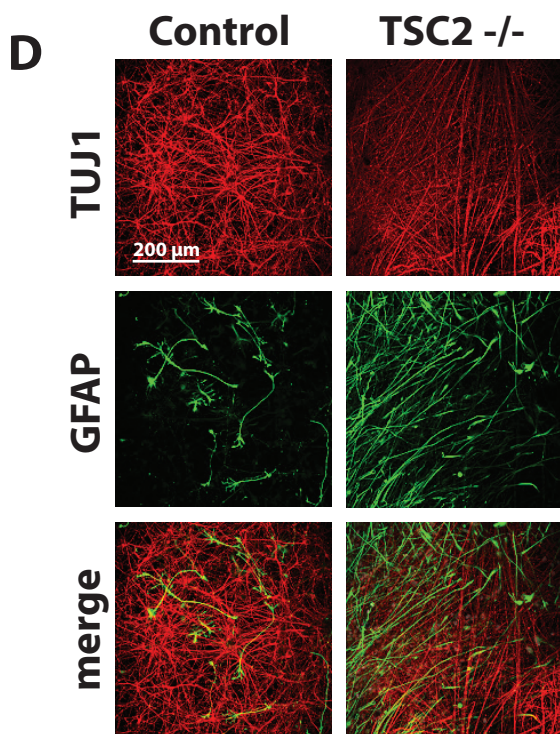

**Additional file 1: Figure S1.** Deregulated expression of neuronal and glial markers in the absence of *TSC2*. **A** *Western blot analysis* of genome-edited control or *TSC2* deleted cell lines after six weeks of differentiation. Success of deletion is confirmed by determination of *TSC2* expression, using *GAPDH* as loading control. Activity of mTOR is monitored through levels of phosphorylated ribosomal protein S6 (p-RPS6), using total RPS6 as loading control. **B** Relative quantification of gene expression for the indicated genes by qPCR as shown in Fig. 1b. **C** *Flow cytometry analysis* monitoring expression of CD44 and CD184 surface markers in differentiating neural cell cultures at the indicated time points to visualize generation of double negative neuronal and double positive astrocytic subpopulations. **D** *Representative confocal images* of 6-week-old neural cultures of control and *TSC2* deleted cell lines stained for TUJ1 and GFAP. Confocal z-axis stacks were acquired and restructured.
