# Supplementary material for: Genomic analysis of the molecular neuropathology of tuberous sclerosis using a human stem cell model
Source: PubMed Central journal article supplement (PMC5031259; doi:10.1186/s13073-016-0347-3), 2016-09-21
Supplement: 13073_2016_347_MOESM7_ESM.pdf [file 13073_2016_347_MOESM7_ESM.pdf]

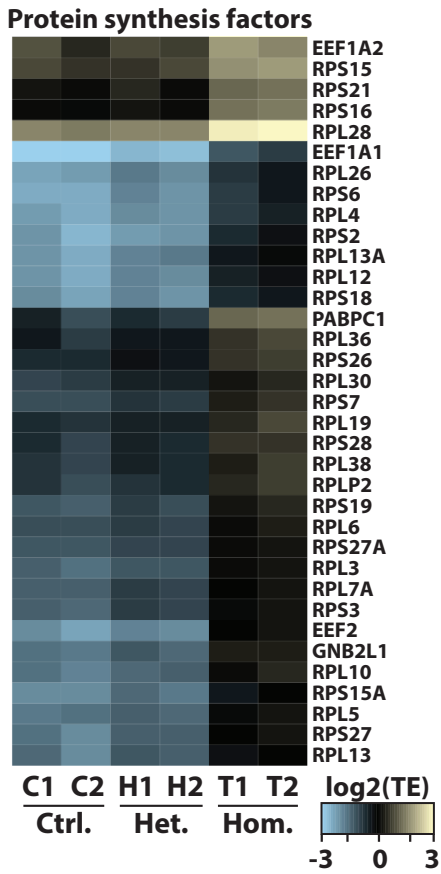

**Additional file 7: Figure S3.** Loss of *TSC2* increases the TE of factors implicated in protein synthesis. *Heat map* of TE of coding for protein synthesis factors in control, *TSC2* heterozygous and homozygous mutant cell lines (n = 2) after 6 weeks of differentiation.
